# Supplementary material for: Cloud responses to climate variability over the extratropicaloceans as observed by MISR and MODIS
Source: Copernicus journal article supplement (doi:10.5194/acp-2018-520), 2018-10-05
Supplement: Supplementary file 1 [file acp-2018-520-supplement.pdf]

## Supplementary Material

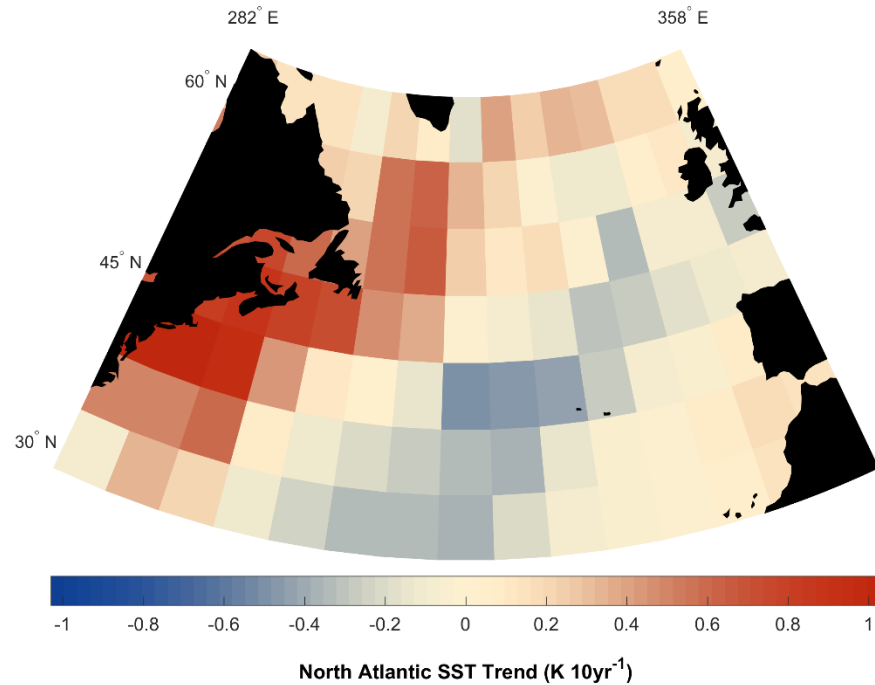

Supplemental Figure 1: Trends in North Atlantic 5-degree averaged monthly SST computed on the Optimum Interpolated Sea Surface Temperature dataset from March 2000 to February 2013. This dataset uses optimum interpolation to blend SST measurements from ships, buoys, and the Advanced Very High Resolution Radiometer (Banzon et al. 2016). The distribution of trends resembles the loading pattern for NA2 in Fig. 2.

Banzon, V., Smith, T. M., Chin, T. M., Liu, C., and Hankins, W., 2016: A long-term record of blended satellite and in situ sea-surface temperature for climate monitoring, modeling and environmental studies. *Earth Syst. Sci. Data*, **8**, 165–176, doi:10.5194/essd-8-165-2016
